# Supplementary material
Source: PubMed Central journal article supplement (PMC9512669)
Supplement: mmc1.pdf [file mmc1.pdf]

**Cell Reports Medicine, Volume 3**

**Supplemental information**

**Multiple BCG vaccinations for the prevention  
of COVID-19 and other infectious diseases  
in type 1 diabetes**

**Denise L. Faustman, Amanda Lee, Emma R. Hostetter, Anna Aristarkhova, Nathan C. Ng, Gabriella F. Shpilsky, Lisa Tran, Grace Wolfe, Hiroyuki Takahashi, Hans F. Dias, Joan Braley, Hui Zheng, David A. Schoenfeld, and Willem M. Kühtreiber**

## **SUPPLEMENTARY INFORMATION**

Denise L. Faustman, Amanda Lee, Emma R. Hostetter, Anna Aristarkhova, Nathan C. Ng, Gabriella F. Shpilsky, Lisa Tran, Grace Wolfe, Hiroyuki Takahashi, Hans F. Dias, Joan Brale , Hui Zheng<sup>1</sup>, David A. Schoenfeld, Willem M. Kühtreiber.

Multiple BCG vaccinations for prevention of COVID-19 and other infectious diseases in Type 1 diabetes

Cell Reports Medicine

Supplemental Figure S1.

| <b>COVID-19 Detection Methods</b>         |               |                                                 |
|-------------------------------------------|---------------|-------------------------------------------------|
| <b>I-IX. COVID-19 Directed Antibodies</b> |               | Antibody Binding Regions                        |
| <b>I-VIII. IgG Antibodies</b>             | Protein array | SARS-CoV-2 Amino Acid (AA) regions <sup>a</sup> |
| I. Spike 1                                |               | 115-QSLLIVNNATNV-126                            |
| II. Spike 1                               |               | 145-YHKNNKSWMESE-156                            |
| III. Spike 1                              |               | 307-TVEKGIYQTSNF-318                            |
| IV. Spike 1                               |               | 319-RVQPTEIVRFP-330                             |
| V. Spike 1                                |               | 457-RKSNLKPFRDI-468                             |
| VI. Spike 2                               |               | 710-NSIAIPTNFTIS-721                            |
| VII. Spike 2                              |               | 1088-HFPREGVFVSN-1099                           |
| VIII. RNA Polymerase                      |               | RNA polymerase                                  |
| <b>IX. IgG Antibodies</b>                 | ELISA         | Spike 1 Receptor Binding Domain <sup>b</sup>    |
| <b>X. Point of Care</b>                   |               |                                                 |
| Nasal Swab                                | RT-PCR        | Nucleocapsid RNA                                |
| Rapid Antigen Test                        | Antigen Test  | Majority nucleocapsid protein                   |
| Antibody Test                             | ELISA         | Nucleocapsid or Spike antibodies                |

<sup>a</sup> SARS-CoV-2 Protein Microarray: 2-in-1 protein and peptide assay from CDI Labs, Baltimore, Maryland (CDICOV2-001.0)  
<sup>b</sup> AntiCoV-ID™ IgG ELISA from Akston BioSciences, Beverly, Massachusetts (SKU: 600016)  
I-X represent the same numbers and thus diagnostic tests shown in Figure 2

### Figure S1: Molecular COVID-19 Detection Methods Indicating Current or Past Infection

Related to Figure 2.

The table gives an overview of all the analytical methods for COVID-19 detection described in this trial (Fig. 2). For confirmation of SARS-CoV-2 infection the presence of subject antibodies to the virus were sought and confirmed through multiple methods (I-VIII). For SARS-CoV-2 antibodies detected, the average and standard deviation of antibody levels prior to the onset of COVID-19 pandemic (Pre-2020) was determined. The average of the levels after the start of the pandemic (2020 and 2021 data) was also calculated. Using these averages and the Pre-2020 standard deviation the Z-score per patient was then calculated. The Z-score thus represents the difference in average pre-COVID and average COVID signal levels, expressed as the number of standard deviations of pre-COVID. A Z-score of  $\geq 3$  was considered to represent a statistically significant difference. Efficacy was calculated from % patients in BCG and placebo groups that had a Z-score  $\geq 3$  using the formula:  $(p1 - p2)/p1 \times 100$ , where p1 is the % COVID-positive in the placebo group and p2 is the % COVID-positive in the BCG group. We also used an ELISA assay specific to antibodies against the Receptor Binding Domain (RBD) portion of the S1 spike subunit (IX). Patients in their community locations also received a diagnosis of COVID-19 infections through a variety of methods, including PCR on nasal samples (X).

Supplemental Figure S2.

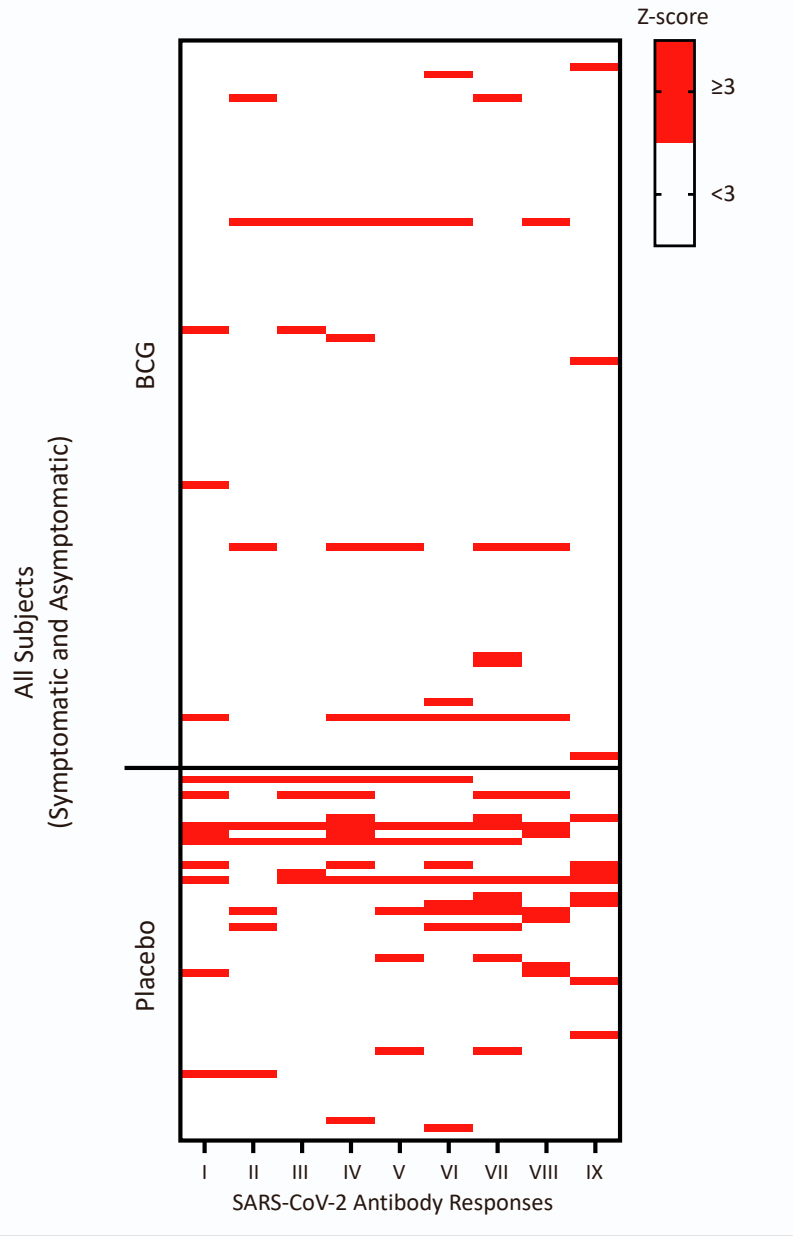

**Figure S2. Heat Map Display of SARS-CoV-2 Epitopes that Tested Positive (Z-score  $\geq 3$ ) for All Trial Participants (Symptomatic as well as Asymptomatic)**  
Related to Figure 3A

**Supplemental Figure S3.**

**A**

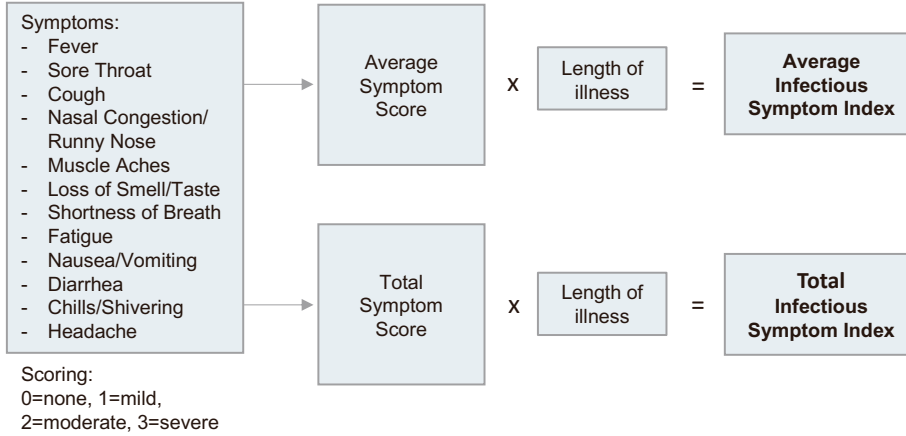

**B**

| Pre-Trial    |                               |                             |             | Current Trial |                               |                             |              |
|--------------|-------------------------------|-----------------------------|-------------|---------------|-------------------------------|-----------------------------|--------------|
| MedDRA Code: | Adverse Event                 | Adverse Events per Patient: |             | MedDRA Code:  | Adverse Event                 | Adverse Events per Patient: |              |
|              |                               | BCG                         | Placebo     |               |                               | BCG                         | Placebo      |
| 10006451     | Bronchitis                    | 0.02                        | 0.02        | 10016791      | Flu-like symptoms             | 0.18                        | 0.19         |
| 10010106     | Common cold                   | 0.06                        | 0.06        | 10040745      | Sinus infection               | 0.02                        | 0.04         |
| 10011224     | Cough                         | 0.01                        | 0.02        | 10046571      | Urinary tract infection       | 0.02                        | 0.06         |
| 10014011     | Ear infection                 | 0.09                        | 0.04        | 10084268      | COVID-19                      | 0.03                        | 0.13         |
| 10021789     | Infection                     | 0.03                        | 0.06        |               | Total:                        | 0.25                        | 0.42         |
| 10034839     | Strep throat                  | 0.02                        | 0.04        |               | <b>Poisson distribution p</b> |                             | <b>0.004</b> |
| 10040745     | Sinus infection               | 0.21                        | 0.21        |               |                               |                             |              |
| 10046571     | Urinary tract infection       | 0.04                        | 0.08        |               |                               |                             |              |
| 10062352     | Upper respiratory infection   | 0.01                        | 0.02        |               |                               |                             |              |
|              | Total:                        | 0.50                        | 0.56        |               |                               |                             |              |
|              | <b>Poisson distribution p</b> |                             | <b>0.46</b> |               |                               |                             |              |

**Figure S3: Infectious Disease Index and Analyzed Infections**

Related to Figure 4 and 5.

(A) Average and Total Infectious Disease Index are calculated as shown.

(B) Infections were documented (through adverse events [AEs] reporting and surveys) during the 2½ year Pretrial period and during the 15-month Current Trial period. Listed are only the infections for which multiple events were documented in both BCG and placebo groups. Poisson distribution analysis shows that there was no significant difference between BCG and placebo AEs during the Pretrial Period (p=0.46), whereas during the Current Trial period the difference was significant (p=0.004).

Supplemental Figure S4.

| Number at risk data for Figure 2B |             |          |          |           |           |
|-----------------------------------|-------------|----------|----------|-----------|-----------|
| Diagnostic                        | No. at Risk | 0 months | 5 months | 10 months | 15 months |
| I                                 | BCG         | 96       | 96       | 96        | 96        |
|                                   | Placebo     | 48       | 44       | 41        | 41        |
| II                                | BCG         | 96       | 94       | 94        | 94        |
|                                   | Placebo     | 48       | 46       | 45        | 43        |
| III                               | BCG         | 96       | 95       | 95        | 95        |
|                                   | Placebo     | 48       | 45       | 42        | 42        |
| IV                                | BCG         | 96       | 95       | 95        | 95        |
|                                   | Placebo     | 48       | 43       | 40        | 48        |
| V                                 | BCG         | 96       | 95       | 95        | 95        |
|                                   | Placebo     | 48       | 46       | 44        | 43        |
| VI                                | BCG         | 96       | 95       | 95        | 94        |
|                                   | Placebo     | 48       | 45       | 42        | 40        |
| VII                               | BCG         | 96       | 95       | 95        | 95        |
|                                   | Placebo     | 48       | 43       | 42        | 39        |
| VIII                              | BCG         | 96       | 95       | 95        | 95        |
|                                   | Placebo     | 48       | 45       | 43        | 42        |
| IX                                | BCG         | 96       | 95       | 95        | 95        |
|                                   | Placebo     | 48       | 46       | 44        | 43        |
| X                                 | BCG         | 96       | 95       | 95        | 95        |
|                                   | Placebo     | 48       | 48       | 44        | 42        |

Number at risk data for Figure 5B

| Symptom             | BCG Cohort Score (%) |    |    |   | Placebo Cohort Score (%) |    |    |    | Household Members Score (%) |    |    |   |
|---------------------|----------------------|----|----|---|--------------------------|----|----|----|-----------------------------|----|----|---|
|                     | 0                    | 1  | 2  | 3 | 0                        | 1  | 2  | 3  | 0                           | 1  | 2  | 3 |
| Headache            | 85                   | 15 | 0  | 0 | 57                       | 29 | 14 | 0  | 75                          | 10 | 15 | 0 |
| Chills/Shivering    | 92                   | 0  | 8  | 0 | 71                       | 14 | 14 | 0  | 95                          | 5  | 0  | 0 |
| Diarrhea            | 100                  | 0  | 0  | 0 | 86                       | 0  | 14 | 0  | 100                         | 0  | 0  | 0 |
| Nausea/Vomiting     | 92                   | 0  | 8  | 0 | 100                      | 0  | 0  | 0  | 95                          | 5  | 0  | 0 |
| Fatigue             | 62                   | 38 | 0  | 0 | 29                       | 14 | 0  | 57 | 60                          | 15 | 20 | 5 |
| Shortness of Breath | 85                   | 15 | 0  | 0 | 57                       | 43 | 0  | 0  | 90                          | 5  | 5  | 0 |
| Loss of Smell/Taste | 100                  | 0  | 0  | 0 | 71                       | 0  | 14 | 14 | 80                          | 15 | 5  | 0 |
| Muscle Aches        | 85                   | 15 | 0  | 0 | 57                       | 14 | 29 | 0  | 70                          | 15 | 15 | 0 |
| Nasal Congestion    | 46                   | 23 | 31 | 0 | 43                       | 29 | 14 | 14 | 65                          | 15 | 15 | 5 |
| Cough               | 54                   | 38 | 8  | 0 | 57                       | 14 | 29 | 0  | 55                          | 25 | 15 | 5 |
| Sore Throat         | 69                   | 23 | 8  | 0 | 86                       | 0  | 14 | 0  | 75                          | 10 | 15 | 0 |
| Fever               | 92                   | 8  | 0  | 0 | 71                       | 29 | 0  | 0  | 75                          | 10 | 10 | 5 |

**Figure S4. Number at risk data for Figure 2B and 5B**

Related to Figure 2B and 5B. Number at risk data for the graphs are shown

Supplemental Figure S5.

### Subject Location Distribution

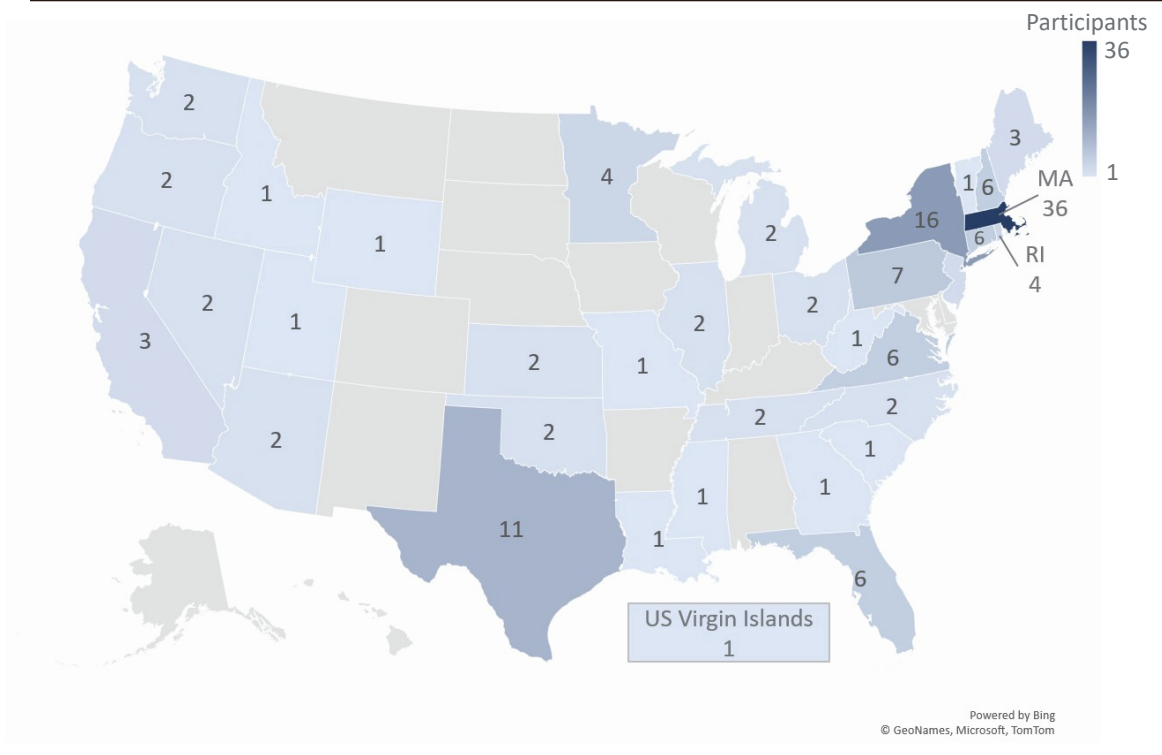

**Figure S5. Geographical Location of Participants within the US as of January 2020**  
Related to Figure 1 and section “Method Details - Study design and participants”.

Supplemental Figure S6.

**Study Synopsis**

|                     |                                                                                                                                                                                                                                                                                                                                |
|---------------------|--------------------------------------------------------------------------------------------------------------------------------------------------------------------------------------------------------------------------------------------------------------------------------------------------------------------------------|
| <b>Title</b>        | <b>USE OF BCG-JAPAN VACCINATIONS TO PREVENT COVID-19 AND LIMIT SYMPTOMS IN AT RISK SUBJECTS</b>                                                                                                                                                                                                                                |
| <b>Short Title</b>  | <b>BCG to Prevent COVID-19</b>                                                                                                                                                                                                                                                                                                 |
| Clinical Phase      | Phase III                                                                                                                                                                                                                                                                                                                      |
| Number of Sites     | 1 enrollment site; US based recruitment                                                                                                                                                                                                                                                                                        |
| IND Sponsor         | Massachusetts General Hospital, Boston, MA                                                                                                                                                                                                                                                                                     |
| Study Objectives    | To determine if multi-dosing BCG-Japan (Tokyo-172) can protect high risk subjects from COVID-19 symptomatic infection.<br><br>To determine the impact (severity, duration of symptoms, absence from work) of BCG-Japan on Covid-19 symptoms.<br><br>To determine if BCG-Japan can also protect from other infectious diseases. |
| Study Design        | Randomized, double blind, placebo-controlled clinical trial of three doses of BCG-Japan                                                                                                                                                                                                                                        |
| Co-primary Outcomes | 1. Prevention of Covid-19 antibody conversion of symptomatic COVID-19 disease<br>2. Prevention of infections that are not COVID-19                                                                                                                                                                                             |

**Figure S6. Study Synopsis for BCG COVID-19 Prevention Trial**  
Related to Figure 1
